# Supplementary material for: Formation of nanoparticles of bi-metallic catalysts for the growth of carbon nanotubes
Source: Royal Society of Chemistry journal article supplement (doi:10.1039/d2tc00397j), 2022-01-01
Supplement: d2tc00397j4.pdf [file d2tc00397j4.pdf]

## SUPPLEMENTARY MATERIALS

### THERMODYNAMICS AND KINETICS OF PHASE TRANSFORMATION IN TWO-COMPONENT SUBMONOLAYER FILMS

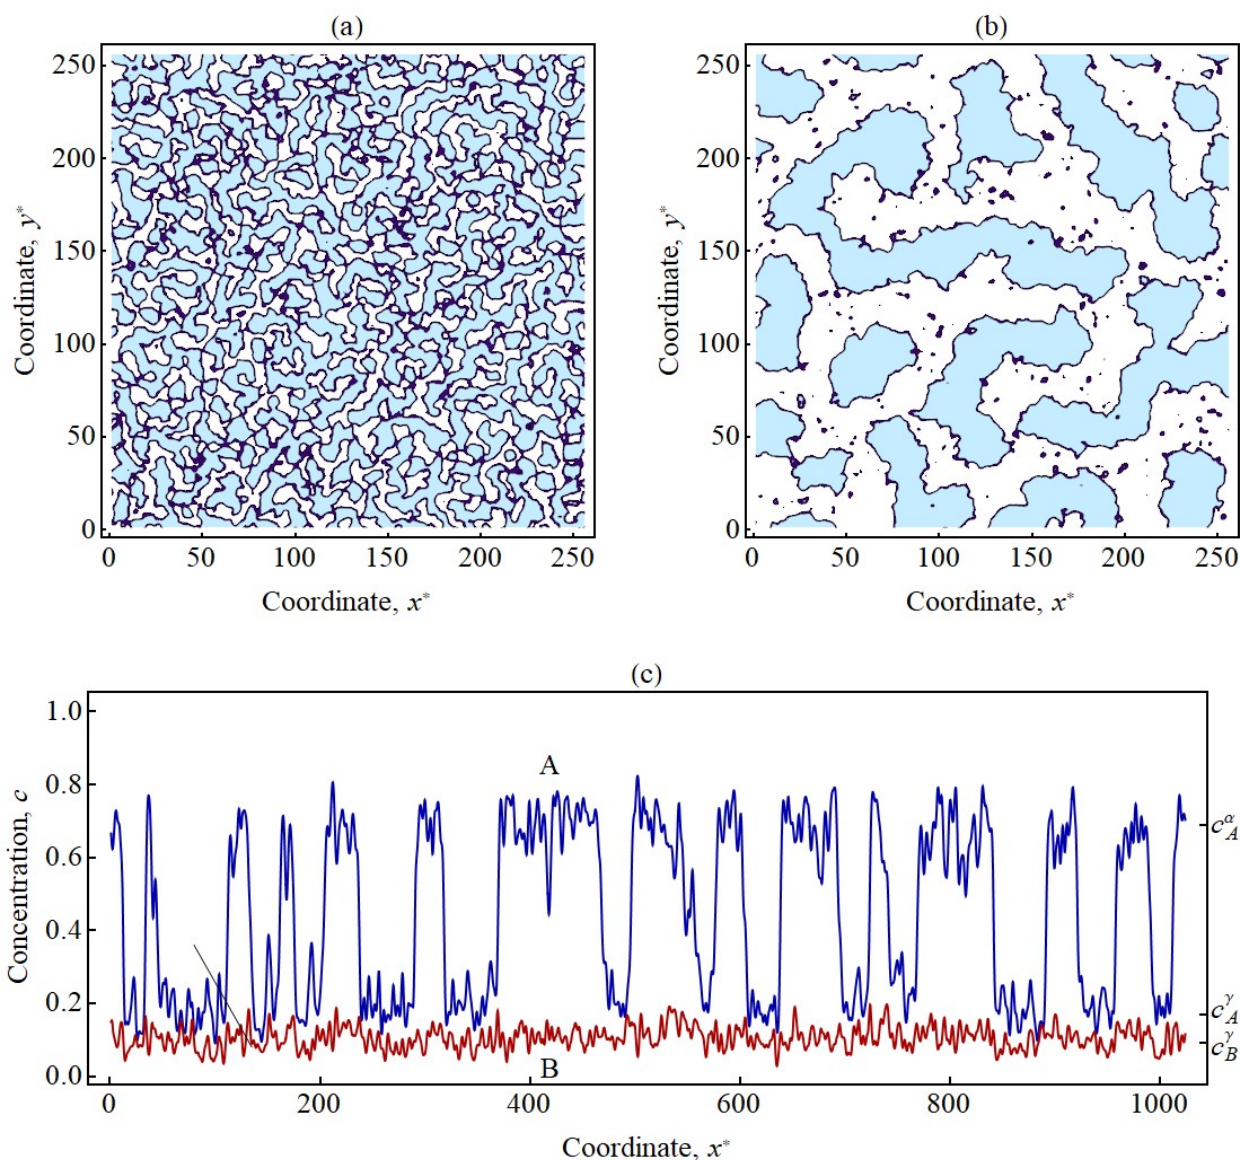

**Figure S1.** Simulation results of the phase transformation in submonolayer film with initial concentrations  $c_A = 0.4$  and  $c_B = 0.1$  at the temperature  $T^* = 0.9$ . Cyan islands in Figs. a and b show the A-rich regions at the substrate ( $c_A > 0.4$ ) at the time points  $t^* = 125$  and  $t^* = 33875$ , respectively. Figure c shows the concentration profiles across the section with coordinate  $y^* = 300$  for atoms A (blue line) and B (red line). Right axis shows the values of equilibrium concentrations from table 1.

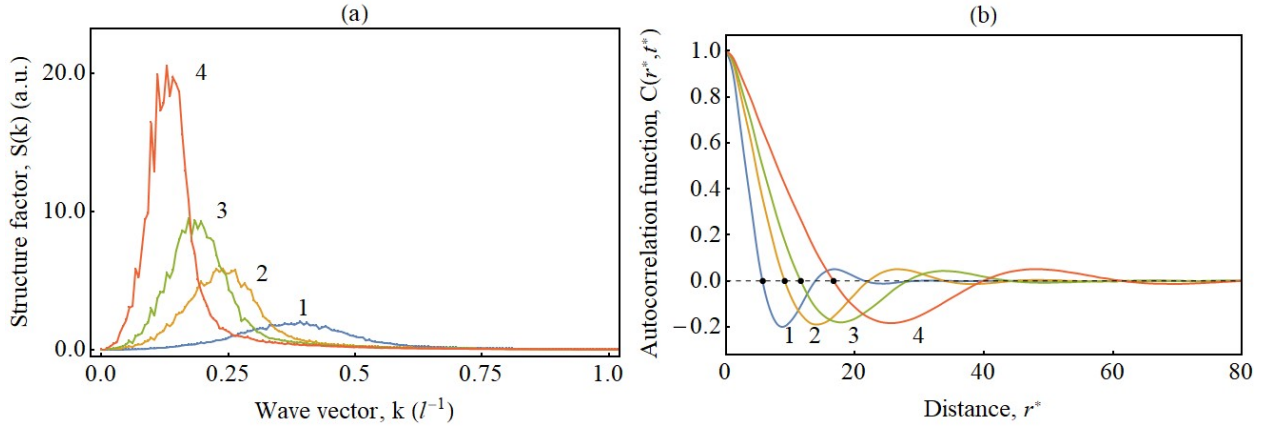

**Figure S2.** Calculation of structure factor (figure a) and autocorrelation function (figure b) for spinodal decomposition of submonolayer film with initial concentrations  $c_A = 0.4$  and  $c_B = 0.1$  at the temperature  $T^* = 0.9$ . Lines are calculated by equations (12) for different time points:  $t^* = 375$ ,  $t^* = 2625$ ,  $t^* = 6375$ ,  $t^* = 25125$ . Black points (figure b) show the coordinate of first zero of autocorrelation function.

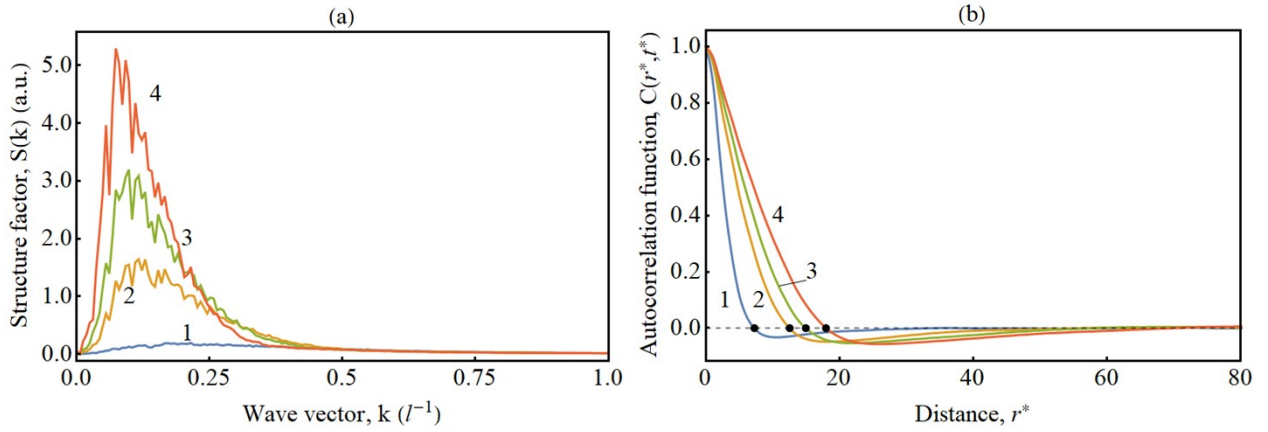

**Figure S3.** Calculation of structure factor (figure a) and autocorrelation function (figure b) for nucleation and growth of islands in submonolayer film with initial concentrations  $c_A = 0.2$  and  $c_B = 0.05$  at the temperature  $T^* = 0.9$ . Lines are calculated by equations (13) for different time points:  $t^* = 1375$ ,  $t^* = 6375$ ,  $t^* = 12652$ ,  $t^* = 35625$ . Black points (figure b) show the coordinate of first zero of autocorrelation function.

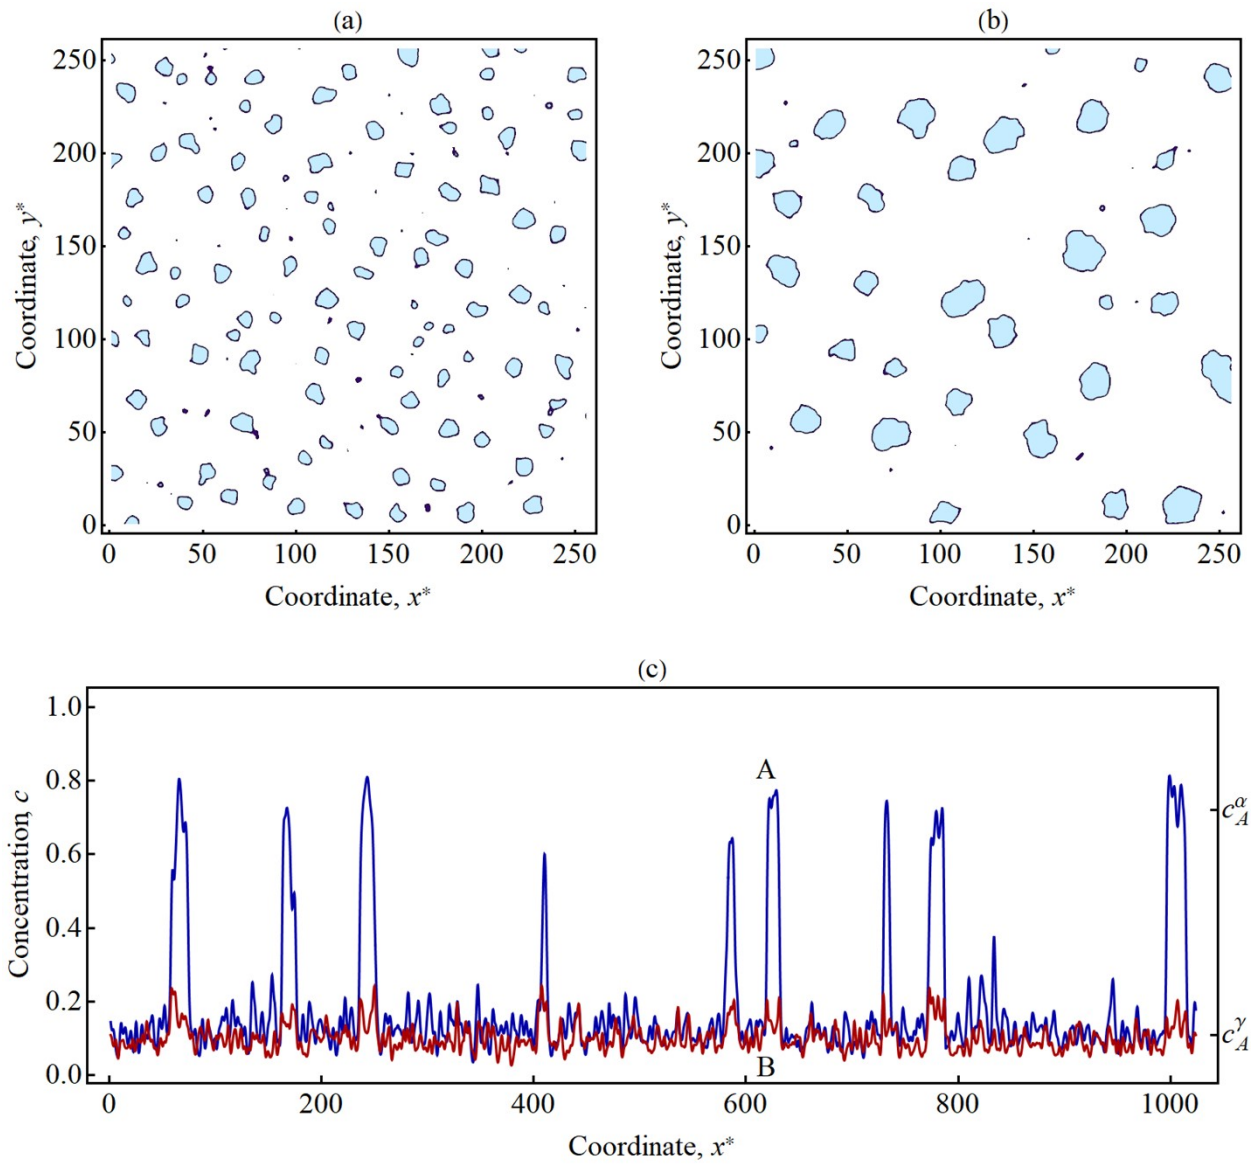

**Figure S4.** Simulation results of the phase transformation in submonolayer film with initial concentrations  $c_A = 0.17$  and  $c_B = 0.1$  at the temperature  $T^* = 0.8$ . Cyan islands in figures (a) and (b) show the A-rich regions at the substrate ( $c_A > 0.4$ ) at the time points  $t^* = 750$  and  $t^* = 22875$ , respectively. Figure c shows the concentration profiles across the section with coordinate  $y^* = 320$  for atoms A (blue line) and B (red line). Right axis (figure c) shows the values of equilibrium concentrations from table 1

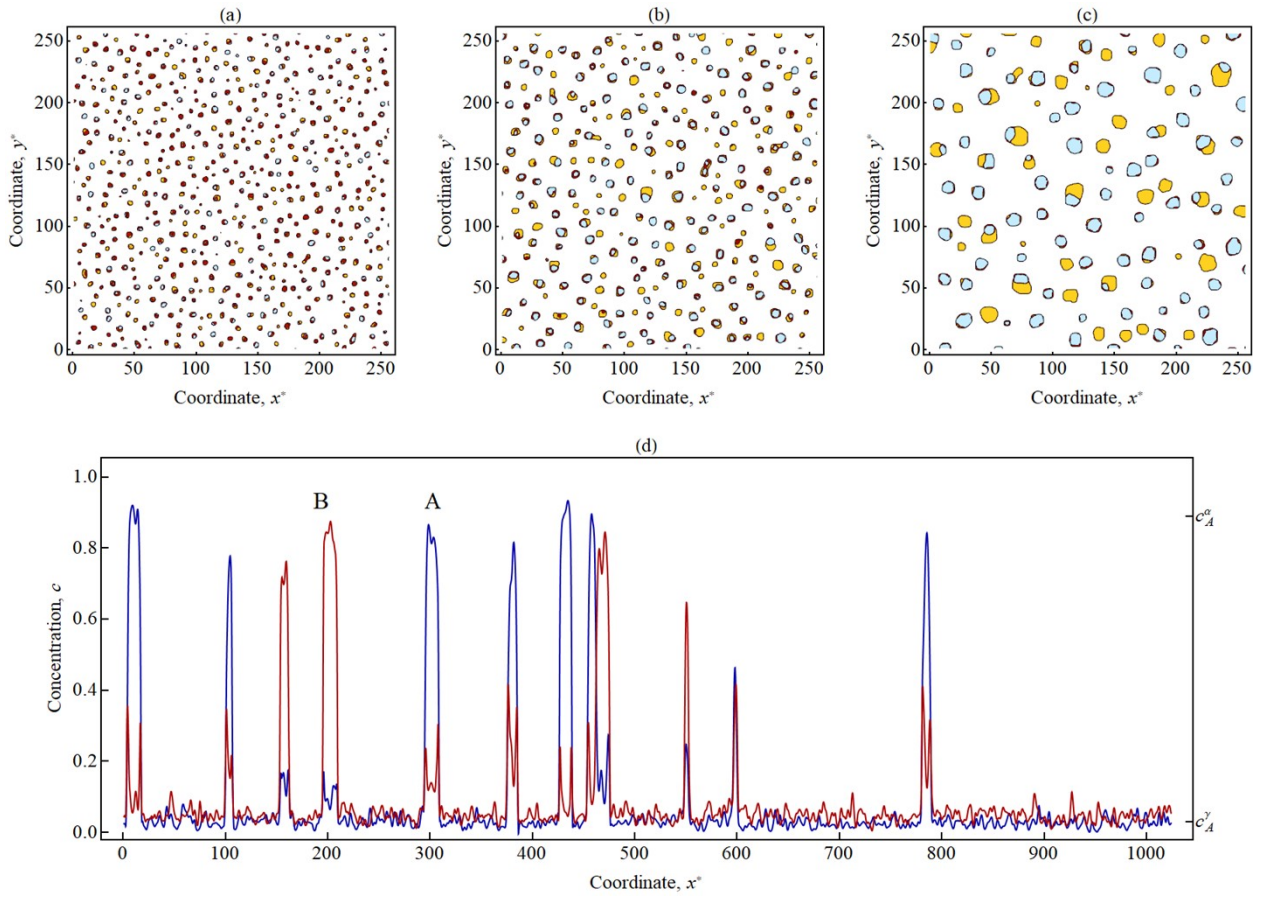

**Figure S5.** Simulation results of the phase transformation in submonolayer film with initial concentrations  $c_A = 0.1$  and  $c_B = 0.1$  at the temperature  $T^* = 0.58$ . Cyan, yellow, and white islands in figures (a-c) show the A-, B- and V-rich regions on the substrate ( $c_A > 0.4, c_B > 0.4$ ) at the time points  $t^* = 125$ ,  $t^* = 1375$ , and  $t^* = 37500$ , respectively. Figure (d) shows the concentration profiles across the section with coordinate  $y^* = 320$  for atoms A (blue line) and B (red line). Right axis (figure d) shows the values of equilibrium concentrations from table 1.



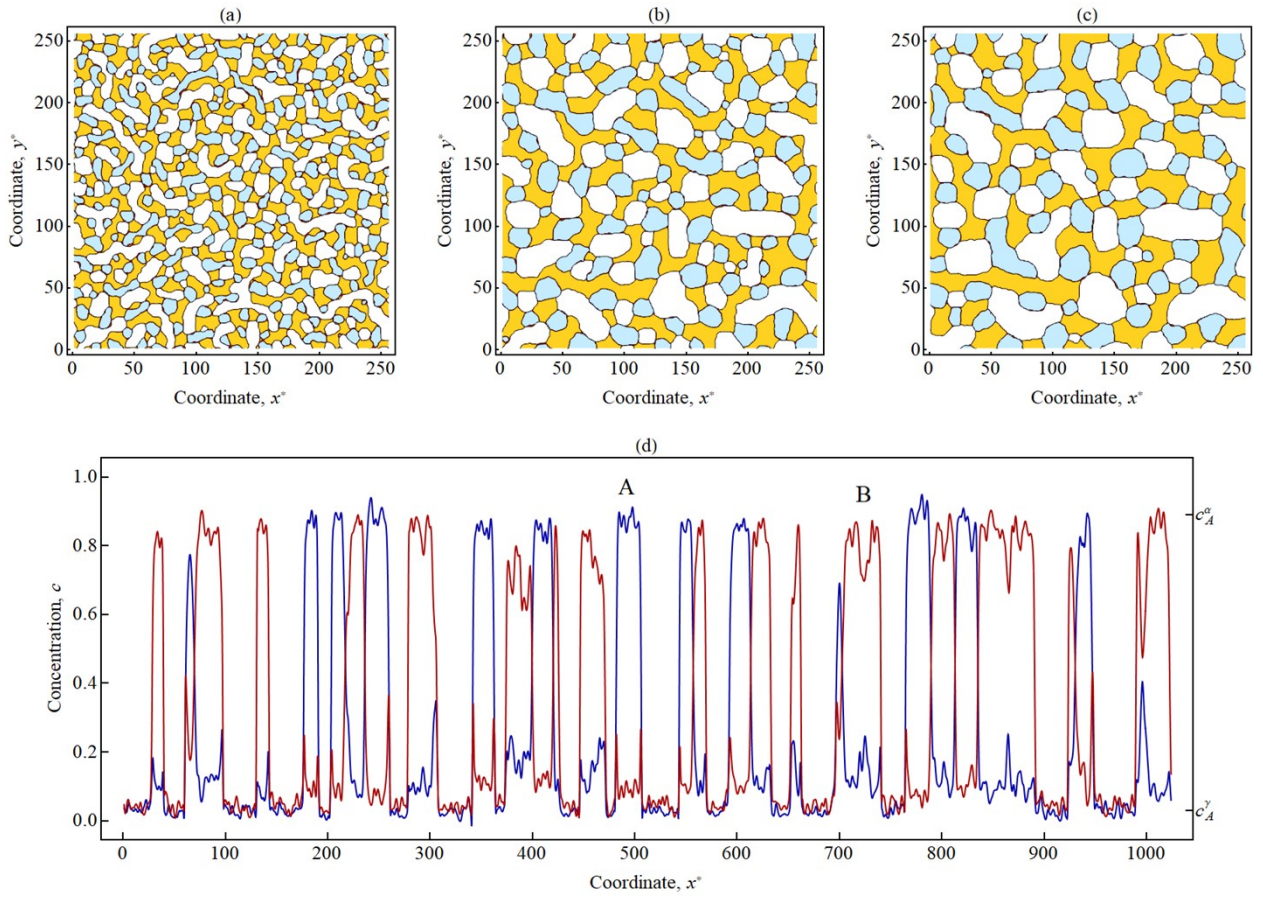

**Figure S6.** Simulation results of the phase transformation in submonolayer film with initial concentrations  $c_A = 0.3$  and  $c_B = 0.3$  at the temperature  $T^* = 0.58$ . Cyan, yellow, and white areas in figures (a-c) show the A-, B- and V-rich regions on the substrate ( $c_A > 0.4, c_B > 0.4$ ) at the time points  $t^* = 1375$ ,  $t^* = 12625$ , and  $t^* = 37500$ , respectively. Figure (d) shows the concentration profiles across the section with coordinate  $y^* = 320$  for atoms A (blue line) and B (red line). Right axis (figure d) shows the values of equilibrium concentrations from table 1.

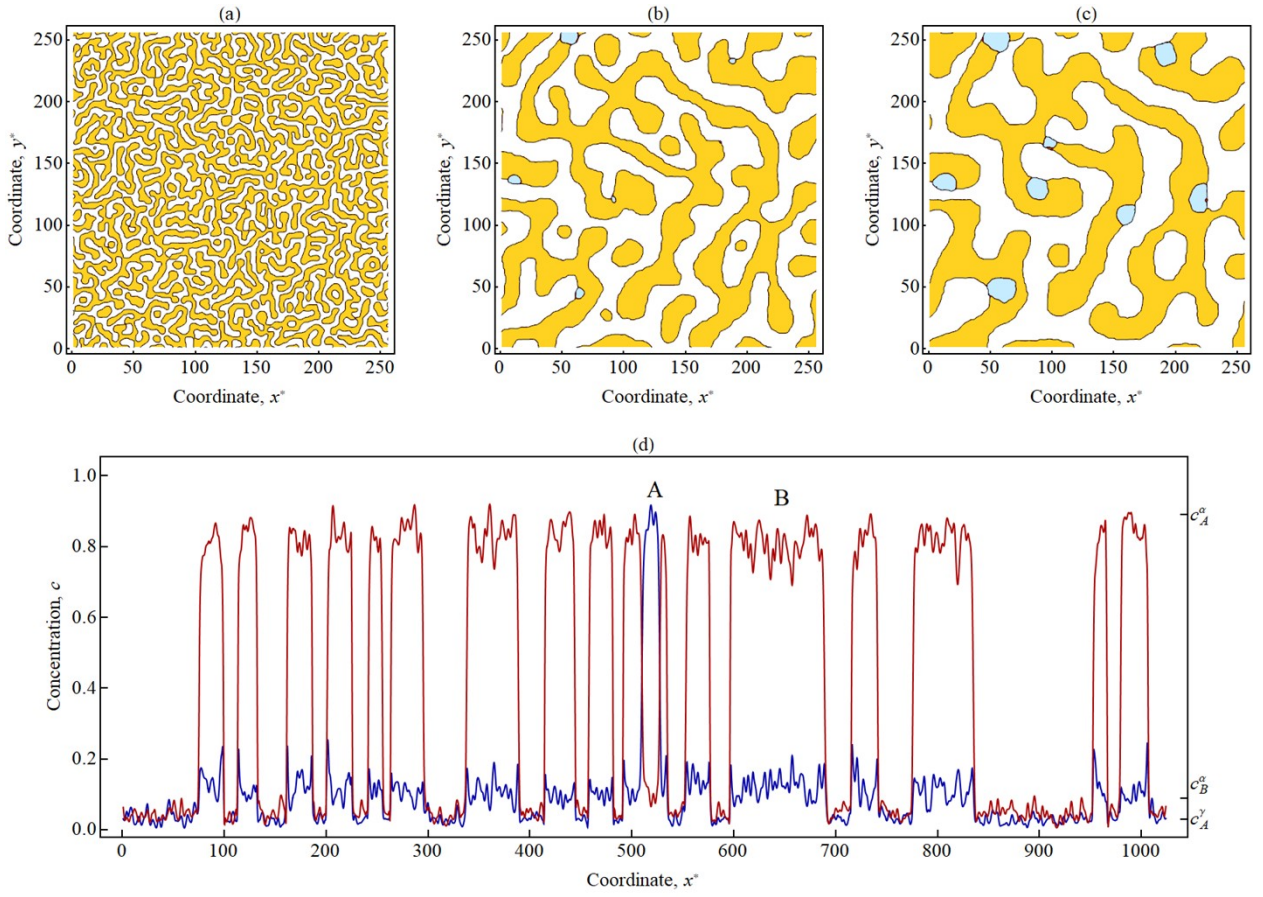

**Figure S7.** Simulation results of the phase transformation in submonolayer film with initial concentrations  $c_A = 0.1$  and  $c_B = 0.4$  at the temperature  $T^* = 0.58$ . Cyan, yellow, and white areas in Figs. (a-c) show the A-, B- and V-rich , respectively ( $c_A > 0.4, c_B > 0.4$ ). Figures a-c correspond to different time points: (a) -  $t^* = 1375$ , (b) -  $t^* = 12625$ , and (c) -  $t^* = 30500$ . Figure (d) shows the concentration profiles across the section with coordinate  $y^* = 320$  for atoms A (blue line) and B (red line) at  $t^* = 30500$ . Right axis (figure d) shows the values of equilibrium concentrations from table 1.

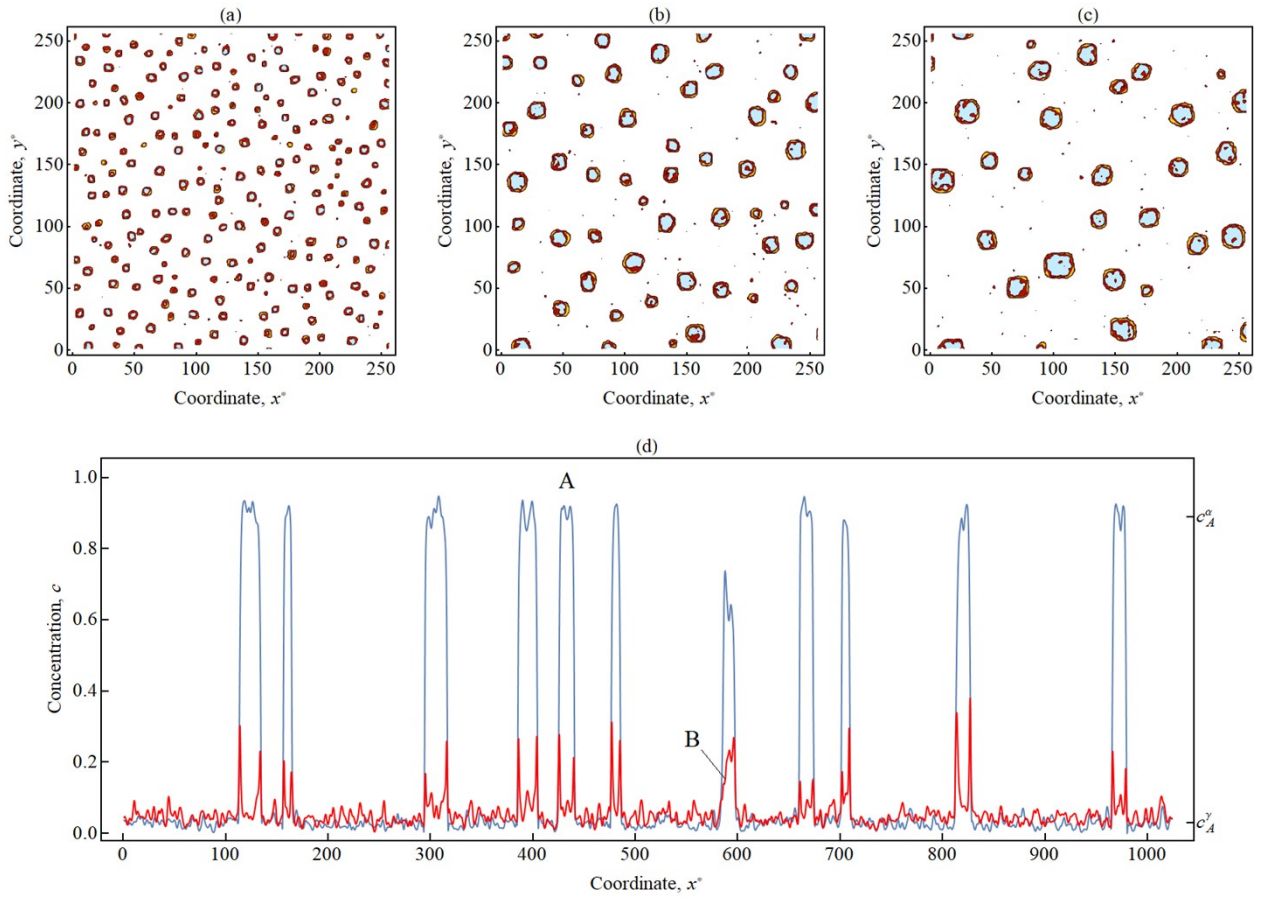

**Figure S8.** Simulation results of the phase transformation in submonolayer film with initial concentrations  $c_A = 0.1$  and  $c_B = 0.05$  at the temperature  $T^* = 0.58$ . Cyan, yellow, and white areas in Figs. (a-c) show the A-, B- and V-rich, respectively ( $c_A > 0.4, c_B > 0.4$ ). Figures (a-c) correspond to different time points: (a) -  $t^* = 1375$ , (b) -  $t^* = 3875$ , and (c) -  $t^* = 87500$ . Figure (d) shows the concentration profiles across the section with coordinate  $y^* = 320$  for atoms A (blue line) and B (red line) at  $t^* = 87500$ . Right axis (figure d) shows the values of equilibrium concentrations from Table 1.

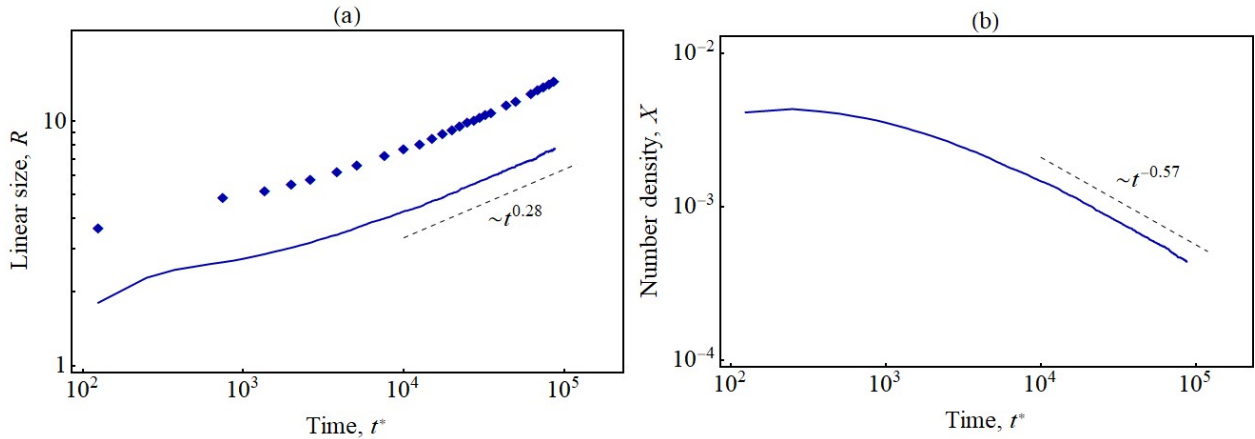

**Figure S9.** Dynamics of the linear size (figure a) and number density (figure b) of islands during phase transformation in two-component film with interaction parameters from Set 1 (table 1) at the temperature of  $T^* = 0.58$  and initial concentration  $c_A = 0.1$  and  $c_B = 0.05$ . Blue lines (1) and points (diamonds) correspond to A-rich phase (see figure S8). Points are calculated as first zero of autocorrelation function, and solid lines are calculated by the NN method. Dashed lines are the power-law dependences determined at the later stage of phase transformation.



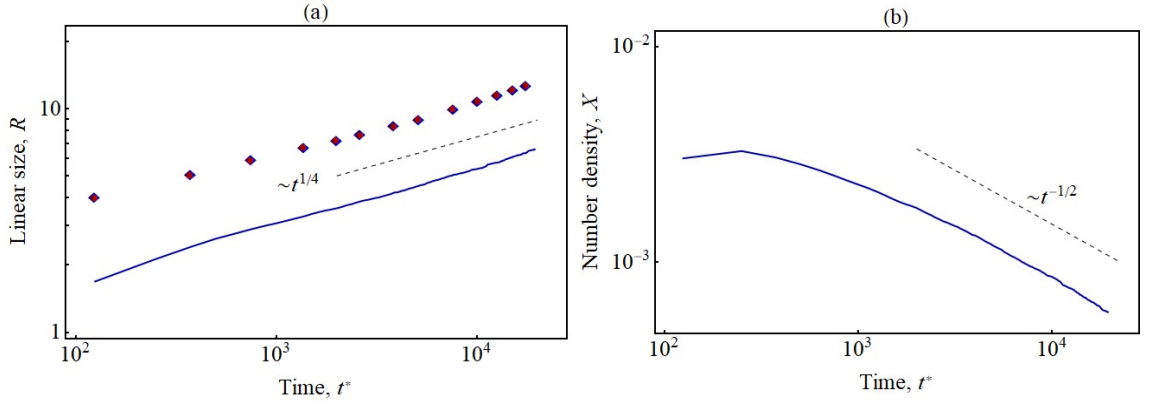

**Figure S10.** Dynamics of the linear size (figure a) and number density (figure b) of islands during phase transformation in two-component film with interaction parameters from Set 2 (table 1) at the temperature of  $T^* = 0.9$  and initial concentration  $c_A = 0.12$  and  $c_B = 0.08$ . Blue lines and points (diamonds) correspond to A-rich phase. Red points (circles) correspond to B-rich phase. Points are calculated as first zero of autocorrelation function, and solid lines are calculated by the NN method. Dashed lines are the power-law dependences determined at the later stage of phase transformation.

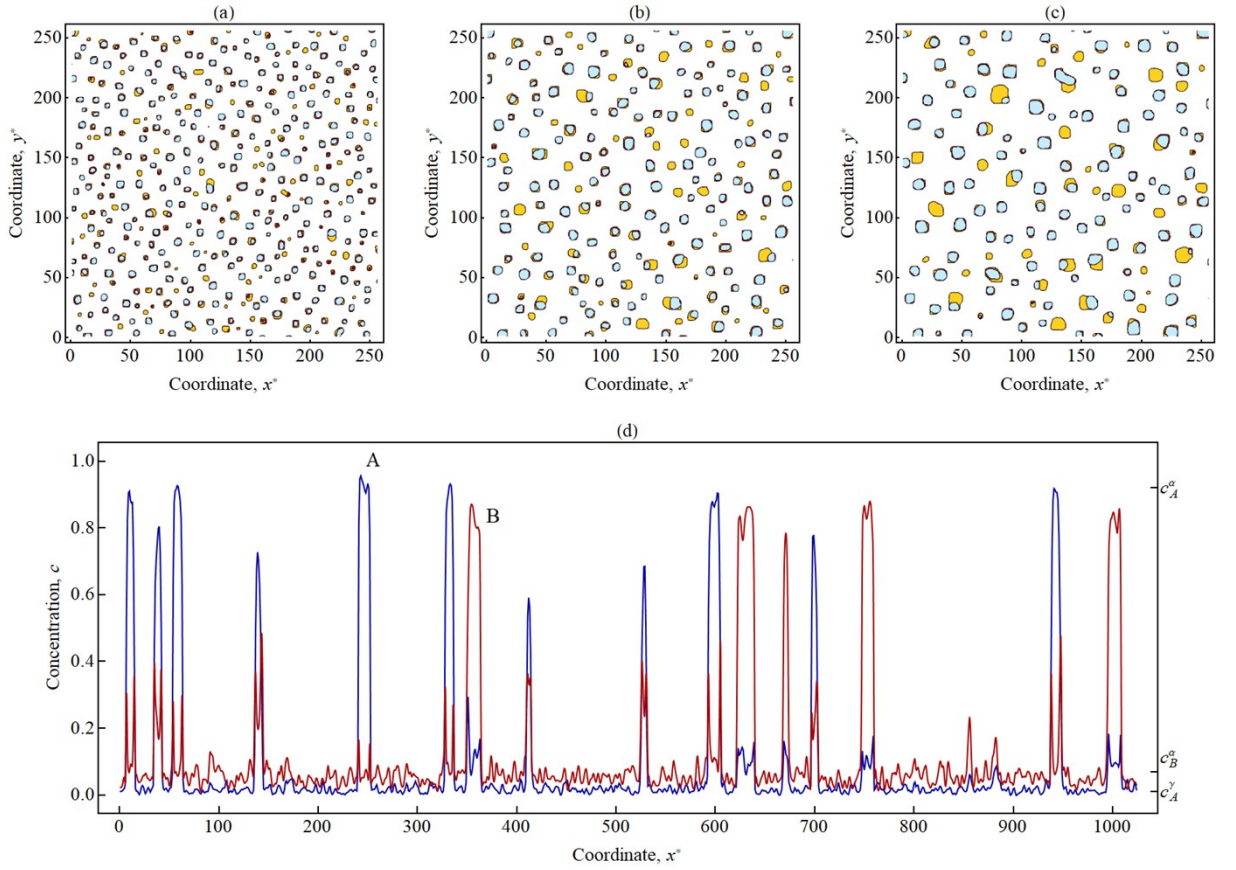

**Figure S11.** Simulation results of the phase transformation in submonolayer film with initial concentrations  $c_A = 0.1$  and  $c_B = 0.1$  at the temperature  $T^* = 0.6$  for interaction parameters from Set 3 (table 1). In Figs. (a-c), cyan, yellow, and white areas show the A-, B- and V-rich regions, respectively. Figures (a-c) are drawn at different time points: (a) -  $t^* = 1375$ , (b) -  $t^* = 6375$ , and (c) -  $t^* = 34000$ , respectively. Figure (d) shows the concentration profiles across the section with coordinate  $y^* = 320$  for atoms A (blue line) and B (red line) at  $t^* = 34000$ . Right axis (figure d) shows the values of equilibrium concentrations from table 1.



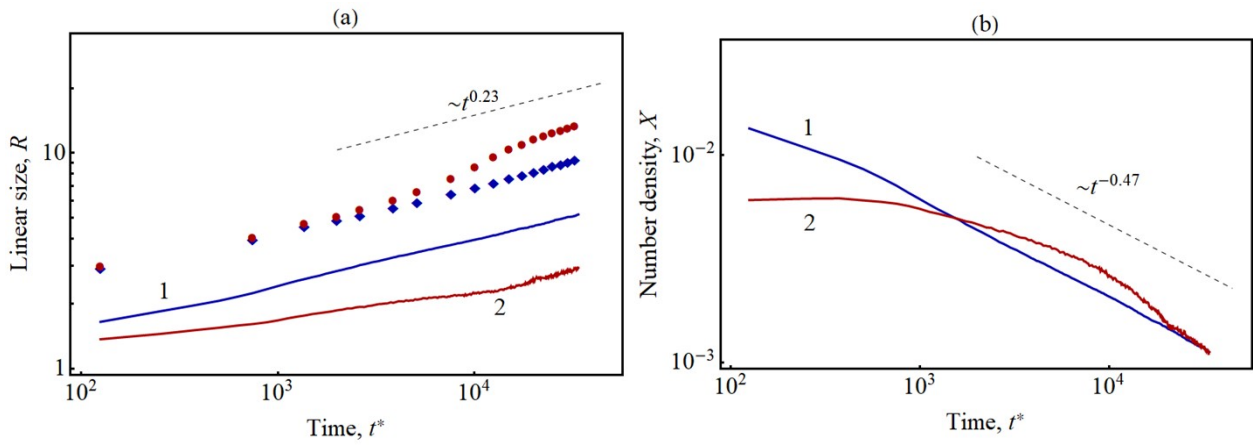

**Figure S12.** Dynamics of the linear size (figure a) and number density (figure b) of islands during phase transformation in two-component film with interaction parameters from Set 3 (Table 1) at the temperature of  $T^* = 0.6$  and initial concentration  $c_A = 0.1$  and  $c_B = 0.1$ . Blue lines (1) and points (diamonds) correspond to A-rich phase. Red points (circles) lines (2) correspond to B-rich phase. Points are calculated as first zero of autocorrelation function, and solid lines are calculated by the NN method. Dashed lines are the power-law dependences determined at the later stage of phase transformation for A-rich phase.

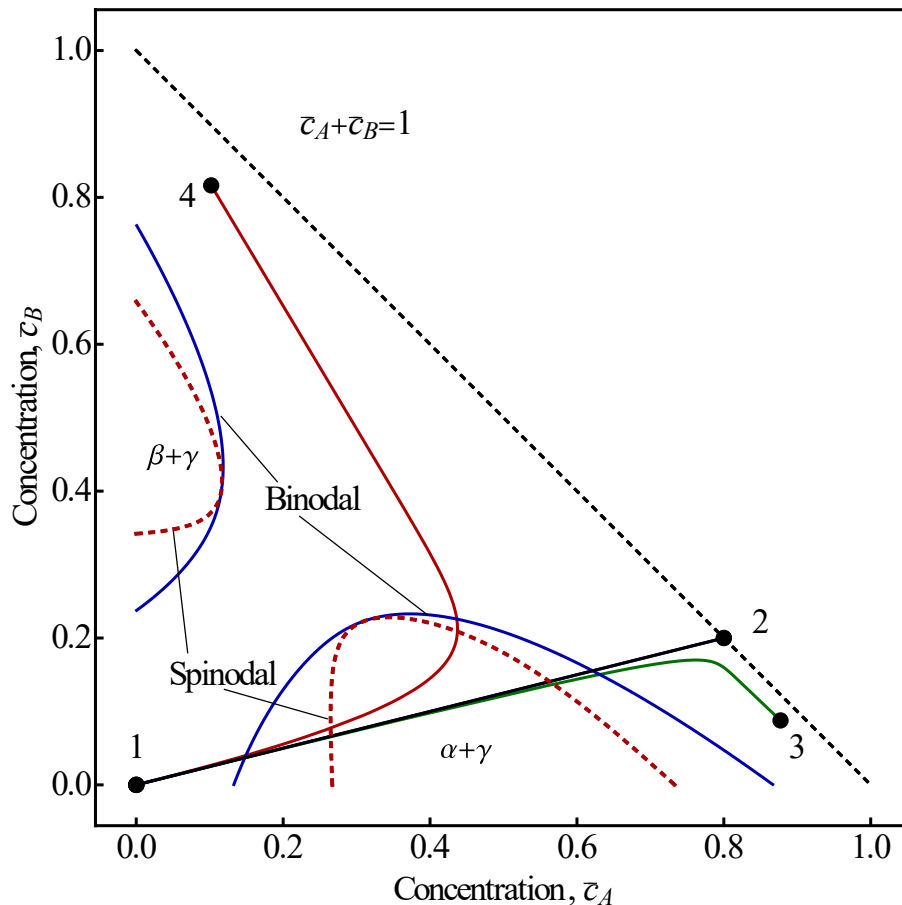

**Figure S13.** Phase diagram of two-component film with interaction parameters Set 1 (table 1) at the temperature of  $T^* = 0.9$  with lines (1-2, 1-3, 1-4) determining change of the composition during deposition and evaporation process (figure 17).

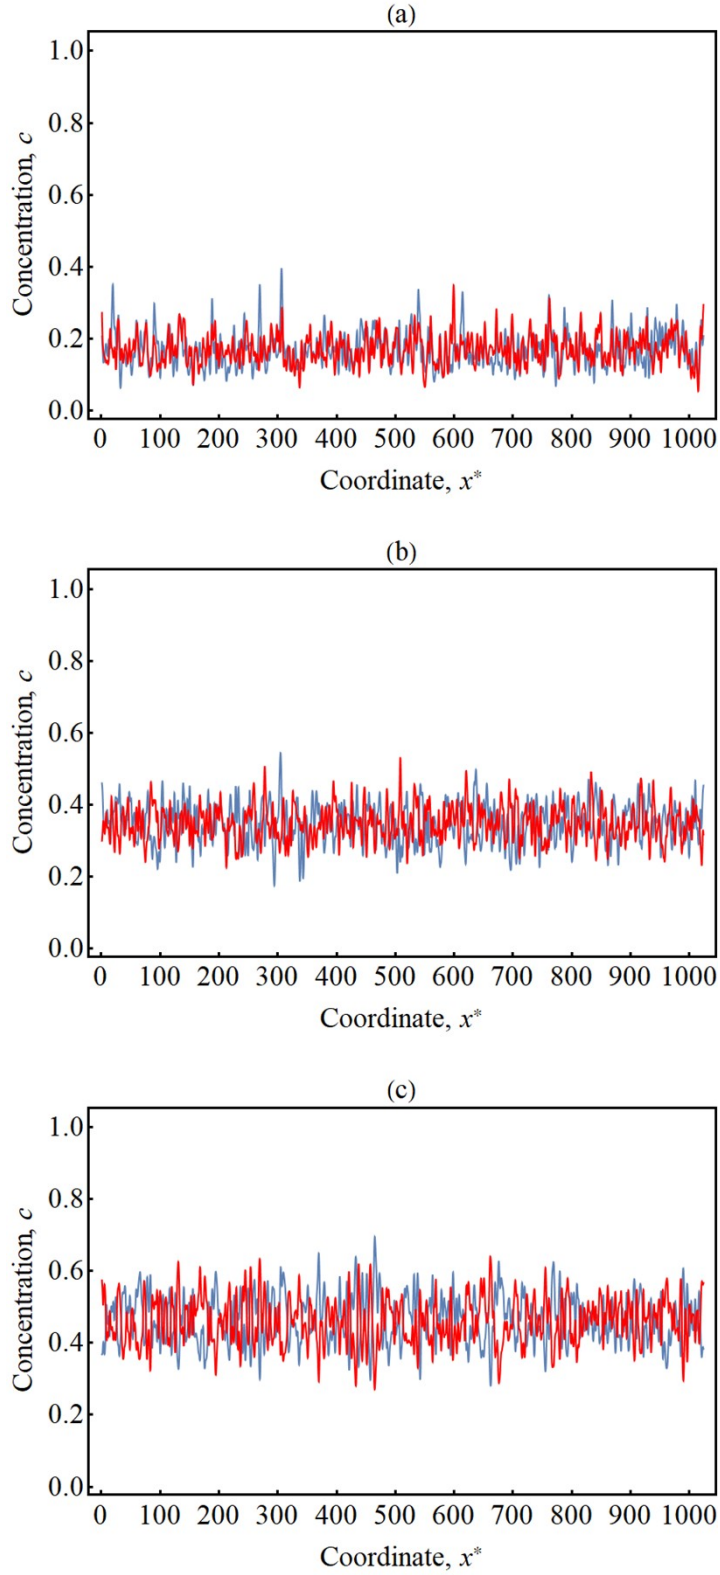

**Figure S14.** Dynamics of concentration profile  $c_A$  and  $c_B$  for the film with interaction parameters from Set 1 (table 1) at the temperature  $T^* = 0.9$  and deposition rates  $I_A^+ = 10^{-4}, I_A^- = 0, I_B^+ = 10^{-4}, I_B^- = 0$ . The trajectory in  $\bar{c}_A - \bar{c}_B$  space does not go through the miscibility gap (see figure 13S), so formation of new phase cannot be observed. Figures correspond to different time points: (a) -  $t^* = 2000$  ( $\bar{c}_A = 0.17, \bar{c}_B = 0.17$ ), (b) -  $t^* = 5750$  ( $\bar{c}_A = 0.34, \bar{c}_B = 0.34$ ), (c)  $t^* = 13000$  ( $\bar{c}_A = 0.46, \bar{c}_B = 0.46$ )

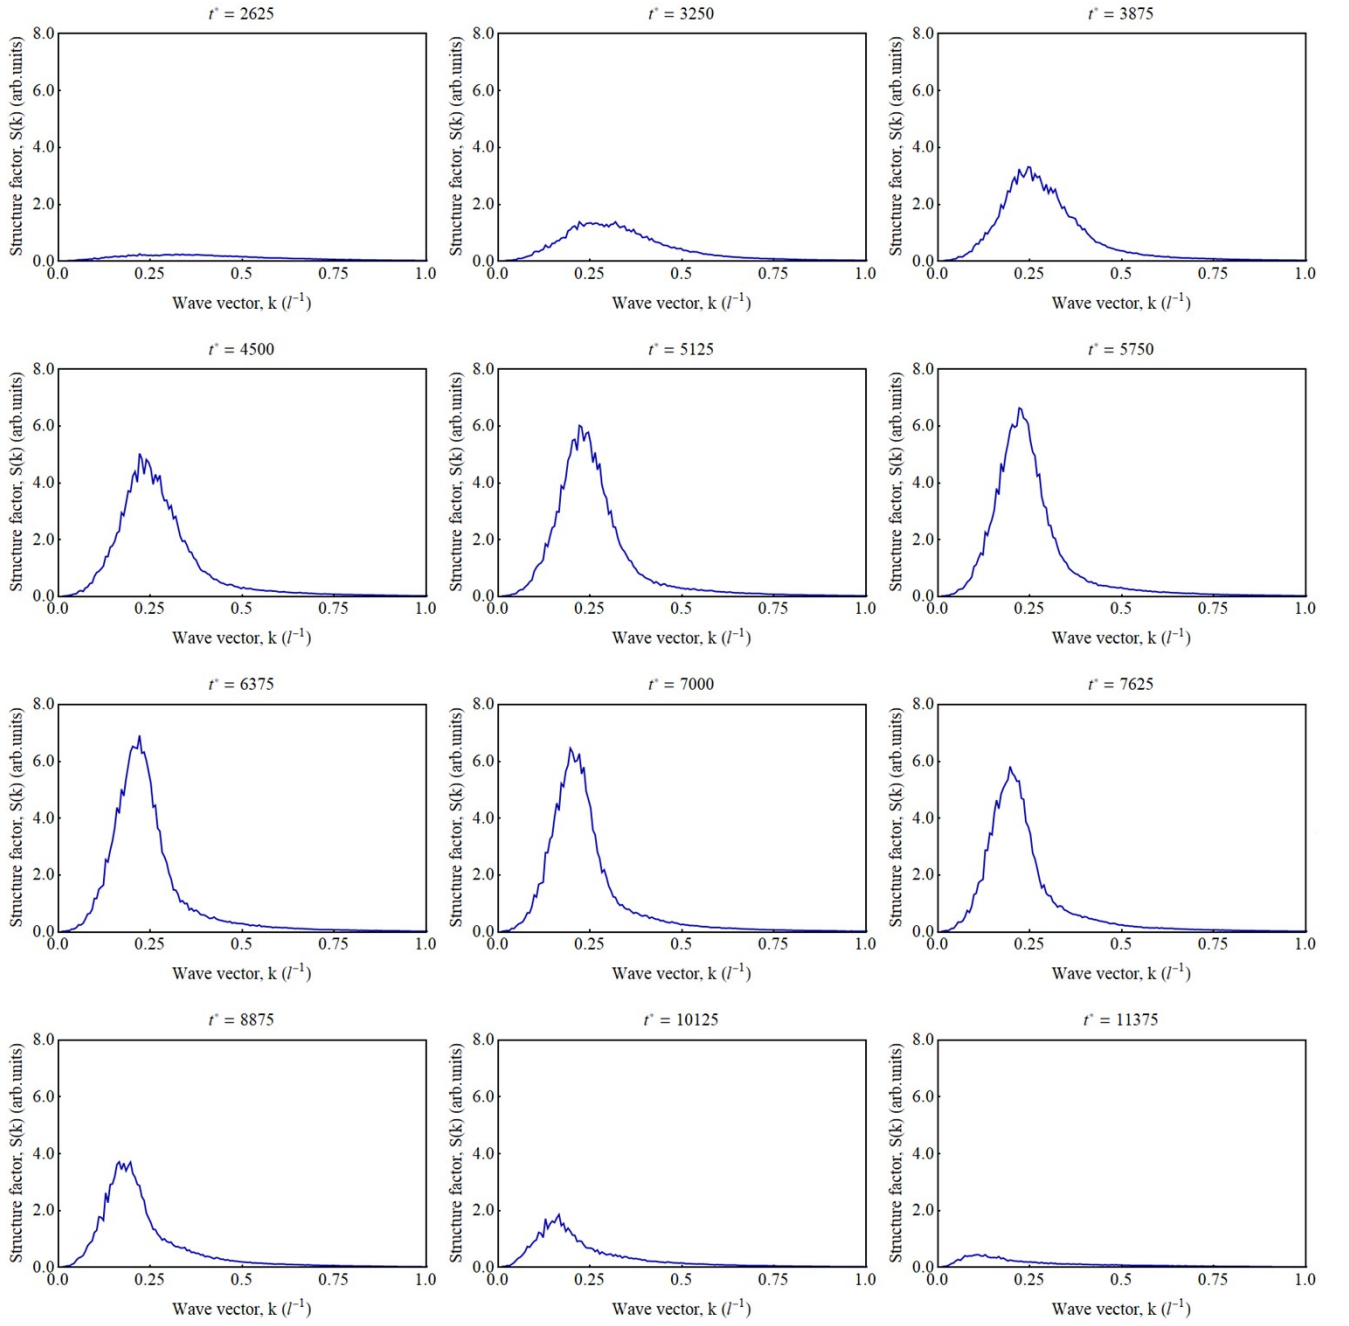

**Figure S15.** Dynamics of the structure factor in two-component film under PVD conditions. Deposition and evaporation rates are  $I_A^{*+} = 10^{-4}$ ,  $I_A^{*-} = 0$ ,  $I_B^{*+} = 0.25 \cdot 10^{-4}$ ,  $I_B^{*-} = 0$ . Corresponding time points are given in the plot labels. Interaction parameters correspond to Set 1 from Table 1, and the temperature is  $T^* = 0.9$ .

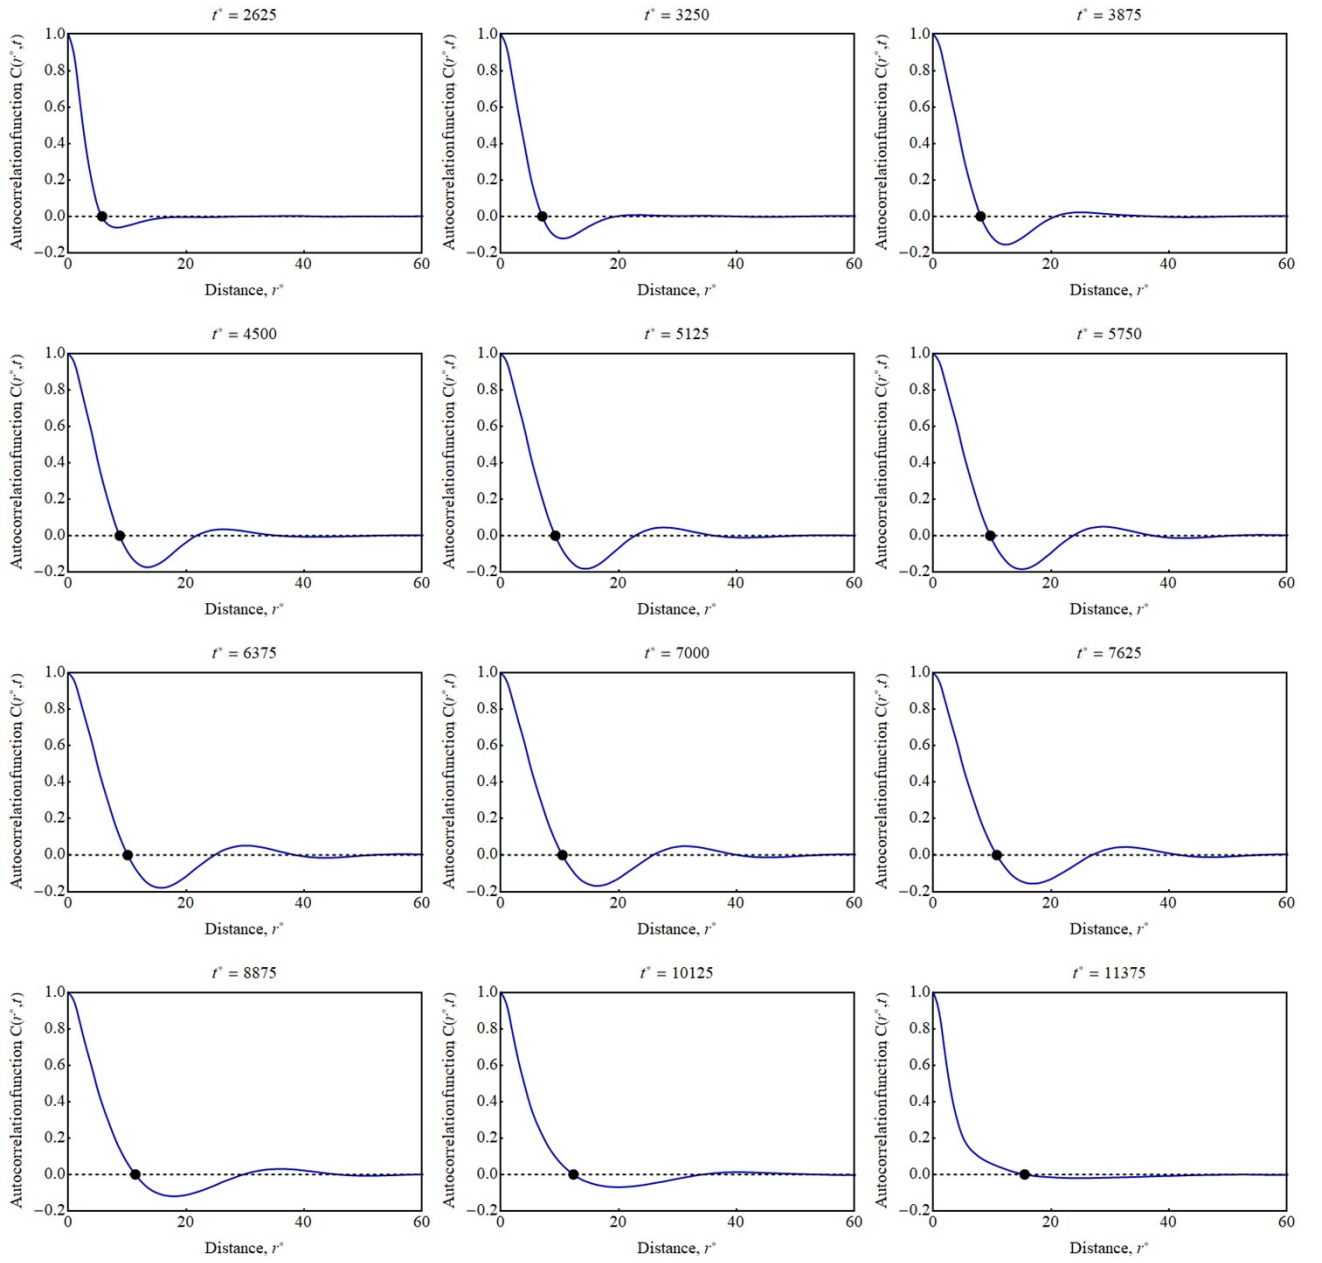

**Figure S16.** Dynamics of the autocorrelation function in two-component film under PVD conditions. Deposition and evaporation rates are  $I_A^{*+} = 10^{-4}$ ,  $I_A^{*-} = 0$ ,  $I_B^{*+} = 0.25 \cdot 10^{-4}$ ,  $I_B^{*-} = 0$ . Corresponding time points are given in the plot labels. Interaction parameters correspond to Set 1 from table 1, and the temperature is  $T^* = 0.9$ . Points show the position of the first minimum of autocorrelation function.



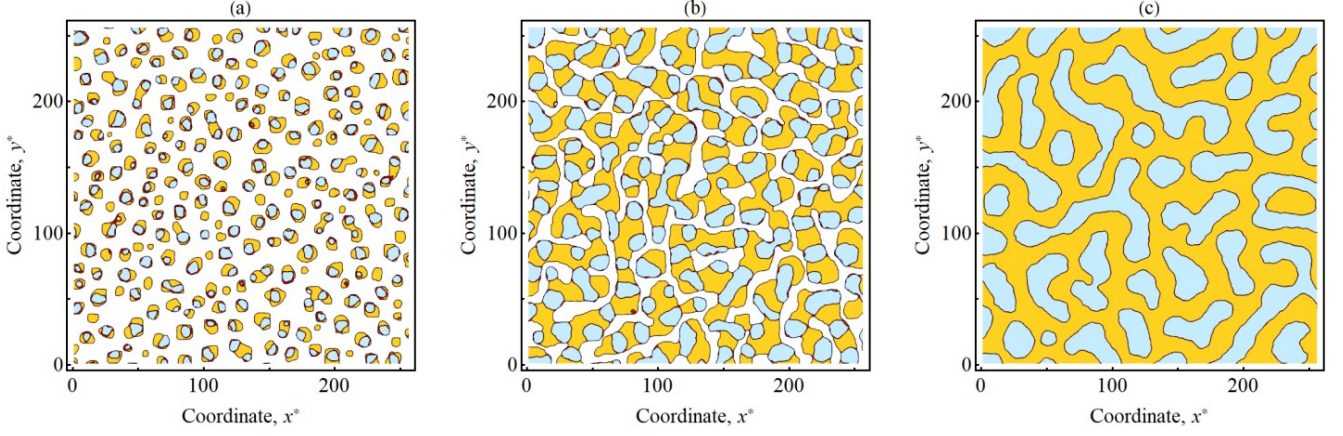

**Figure S17.** Dynamics of the concentration fields  $c_A$  and  $c_B$  under PVD condition with deposition and evaporation rate coefficients equal  $I_A^{*+} = 10^{-4}, I_A^{*-} = 0, I_B^{*+} = 10^{-4}, I_B^{*-} = 0$ . Cyan and yellow regions correspond to concentrations greater than  $c_A > 0.4$  and  $c_B > 0.4$ , respectively. Figures are the snapshots at different time points  $t^*$ : (a) – 2000, (b) – 6375, (c) – 16750. Interaction parameters correspond to Set 1 from Table 1, and the temperature is  $T^* = 0.58$ .

**Movie S1.** Dynamics of the concentration field  $c_A$  (left figure) under PVD condition with deposition and evaporation rate coefficients equal  $I_A^{*+} = 10^{-4}, I_A^{*-} = 0, I_B^{*+} = 0.25 \cdot 10^{-4}, I_B^{*-} = 0$ . Cyan regions correspond to concentrations greater than  $c_A > 0.4$ . Interaction parameters correspond to Set 1 from table 1, and the temperature is  $T^* = 0.9$ . Right figure shows the trajectory in  $\bar{c}_A - \bar{c}_B$  space conjugated with the binodal and spinodal line. Running point shows the current position of the system on this trajectory.

**Movie S2.** Dynamics of the concentration fields  $c_A$  and  $c_B$  under PVD condition with deposition and evaporation rate coefficients equal  $I_A^{*+} = 10^{-4}, I_A^{*-} = 0, I_B^{*+} = 10^{-4}, I_B^{*-} = 0$  (left figure). Interaction parameters correspond to Set 1 from table 1, and the temperature is  $T^* = 0.58$ .

**Movie S3.** Dynamics of the concentration fields  $c_A$  and  $c_B$  under PVD condition with deposition and evaporation rate coefficients equal  $I_A^{*+} = 10^{-3}, I_A^{*-} = 8.0 \cdot 10^{-4}, I_B^{*+} = 2.5 \cdot 10^{-4}, I_B^{*-} = 2.5 \cdot 10^{-5}$ . Cyan and yellow regions correspond to concentrations greater than  $c_A > 0.4$  and  $c_B > 0.4$ , respectively. Interaction parameters correspond to Set 1 from table 1, and the temperature is  $T^* = 0.58$ . Right figure shows the dynamics of overall concentration deposited on the substrate. Running points correspond to current overall concentration of atoms.
